# Supplementary material for: Synthesis of phosphinoferrocene amides and thioamides from carbamoyl chlorides and the structural chemistry of Group 11 metal complexes with these mixed-donor ligands
Source: Royal Society of Chemistry journal article supplement (doi:10.1039/c4dt03279a), 2014-12-24
Supplement: c4dt03279a1.pdf [file c4dt03279a1.pdf]

# Synthesis of phosphinoferrocene amides and thioamides from carbamoyl chlorides and the structural chemistry of Group 11 metal complexes with these mixed-donor ligands

Tiago A. Fernandes, Hana Solařová, Ivana Císařová, Filip Uhlík,  
Martin Štícha and Petr Štěpnička\*

## Supporting Information

### Contents

|                                                                                 |      |
|---------------------------------------------------------------------------------|------|
| Displacement ellipsoid plots for all structures                                 | S-2  |
| An overlap of the structurally independent molecules of <b>8d</b>               | S-9  |
| Summary of crystallographic data and structure refinement parameters            | S-10 |
| Comparison of calculated and experimental geometry for <b>2</b>                 | S-14 |
| Comparison of calculated and experimental geometry for <b>3</b>                 | S-17 |
| Overlaps of the calculated and experimental structures of <b>2</b> and <b>3</b> | S-20 |

## Displacement ellipsoid plots (at the 30% probability level)

### Compound 2

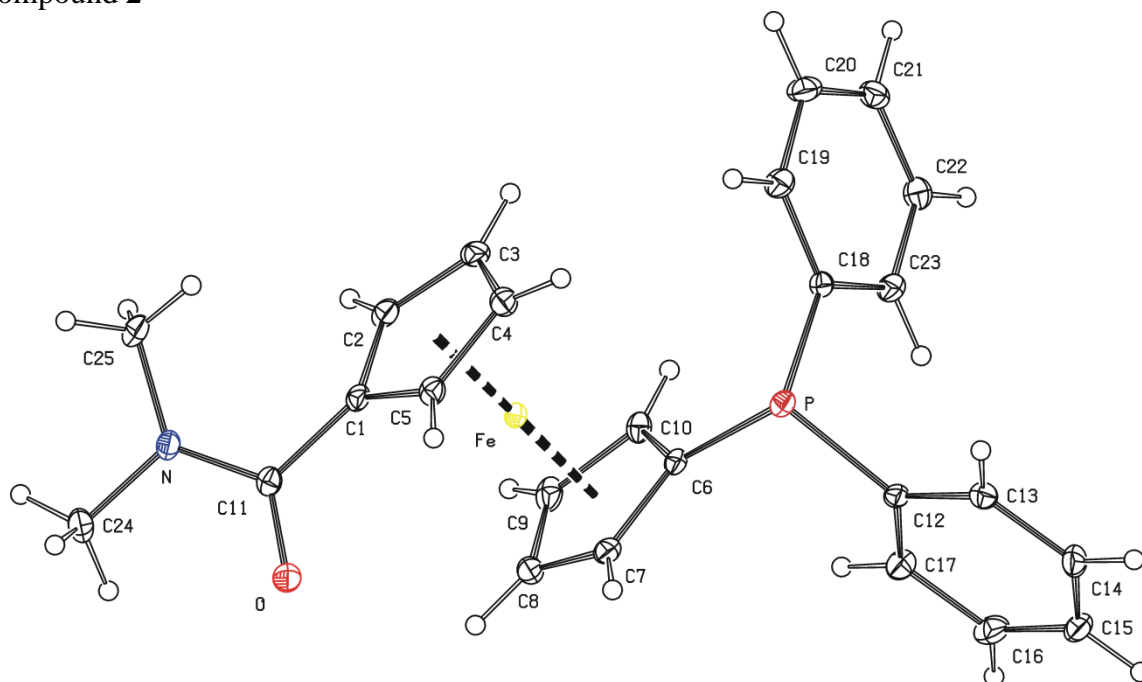

### Compound 3

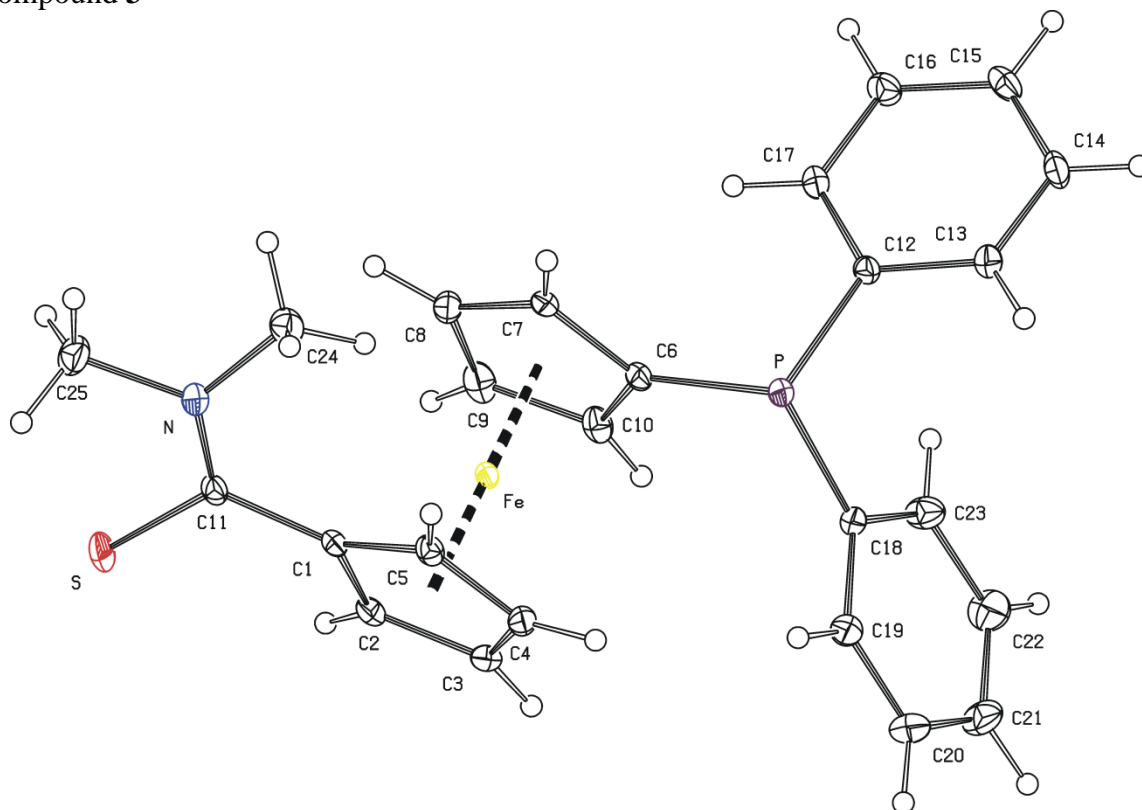

### Compound 30

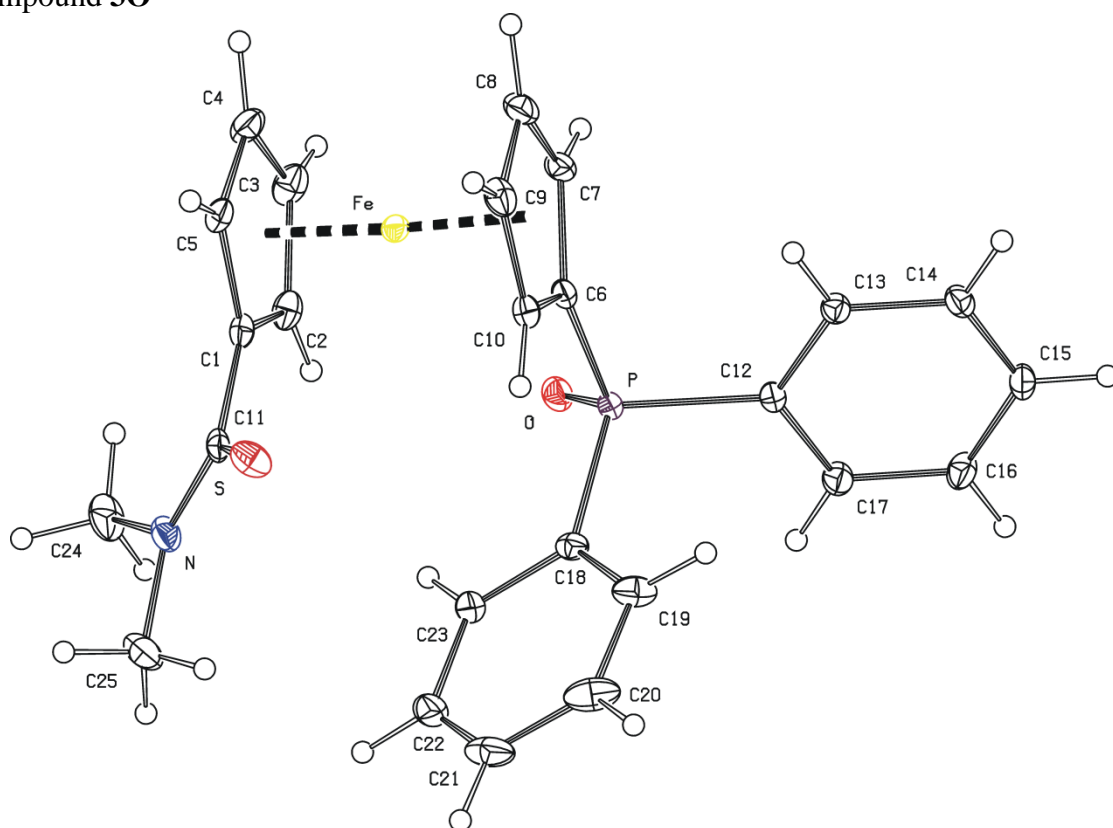

### Compound 4

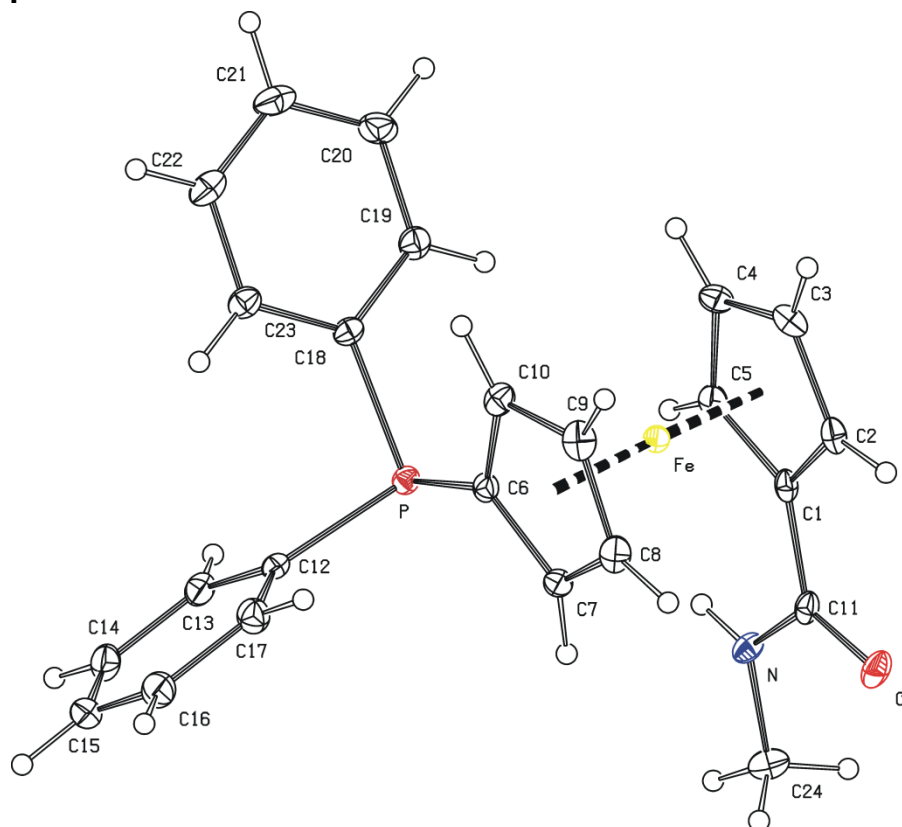

Compound **40**·CHCl<sub>3</sub>

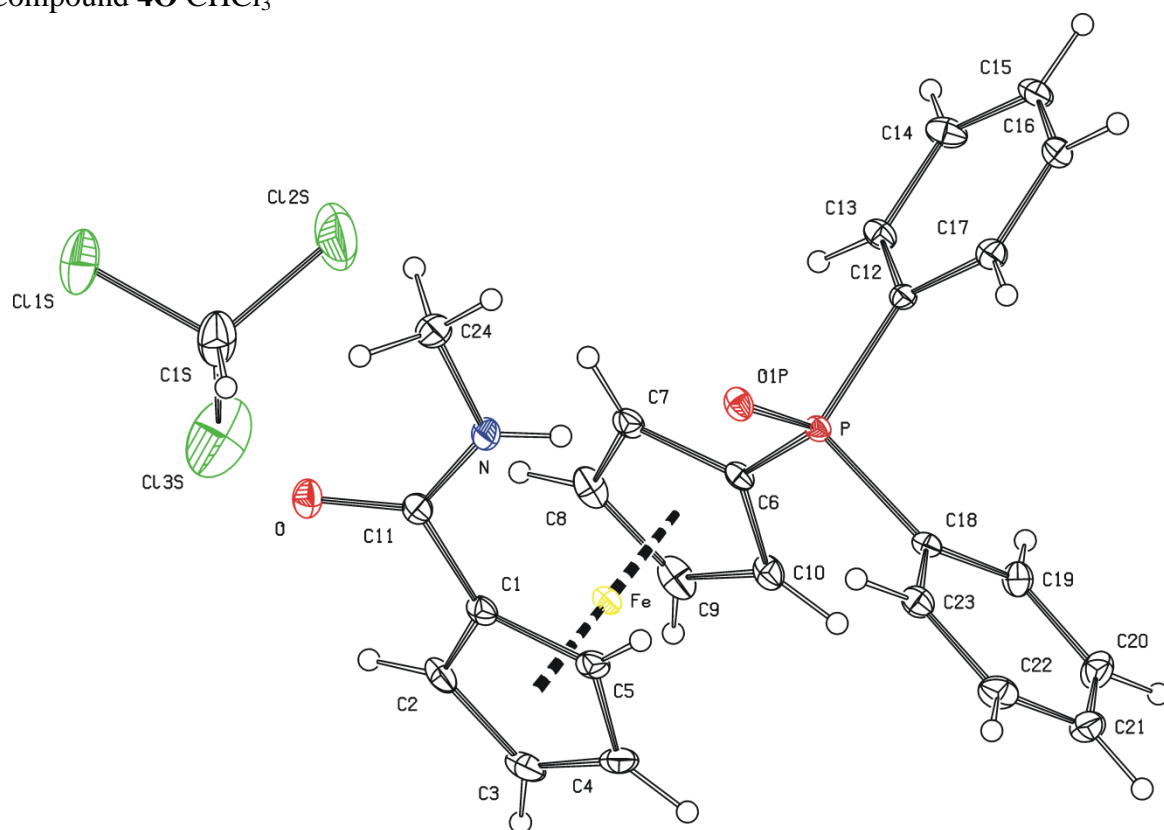

Compound **4S**

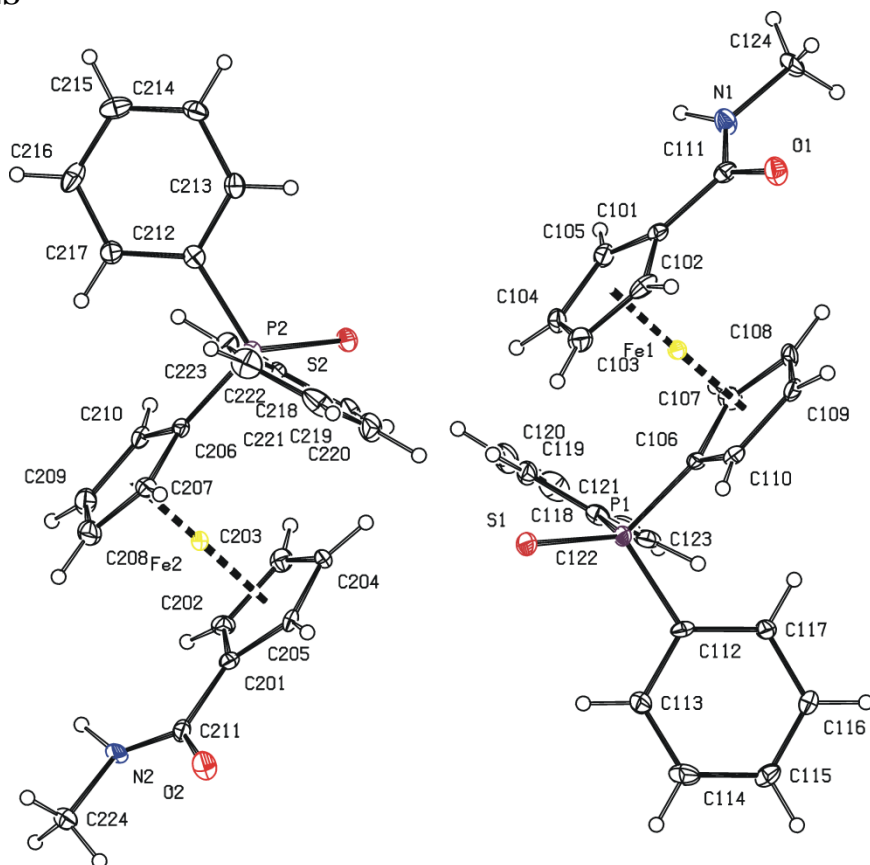

View of the cation in the structure of **6b**·1/4CHCl<sub>3</sub>

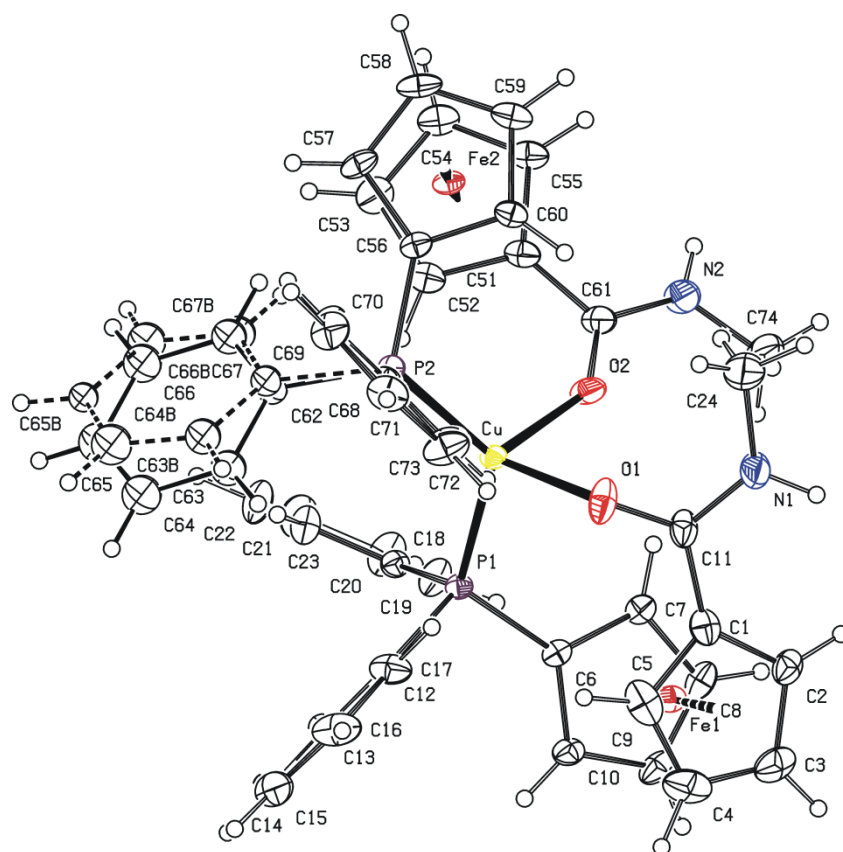

View of the cation in the structure of **6d**·2CHCl<sub>3</sub>

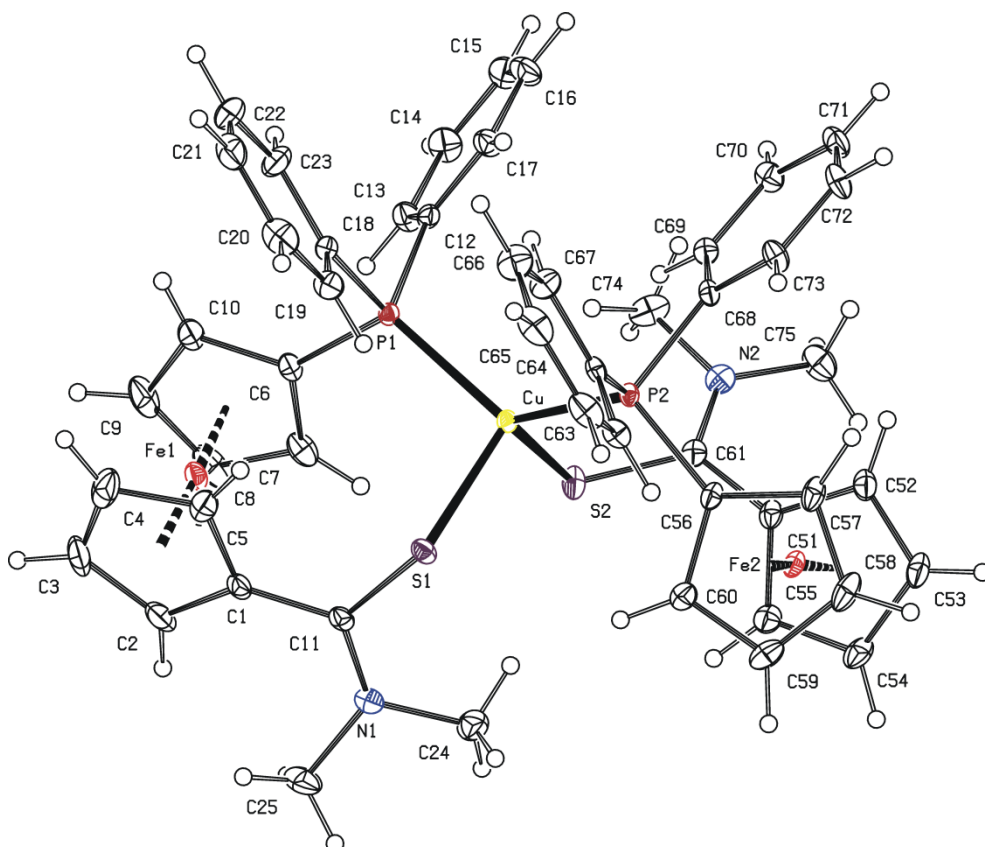

View of the cation in the structure of **6a'**·4CHCl<sub>3</sub>

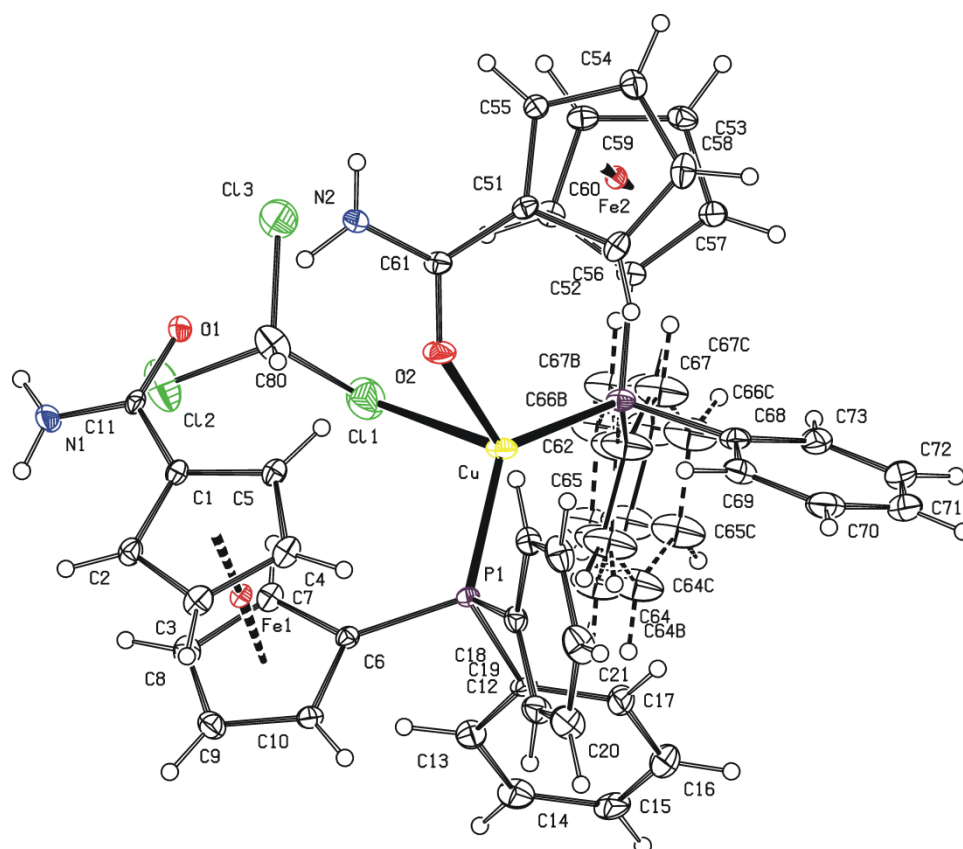

View of the cation in the structure of **7b**·4CHCl<sub>3</sub>

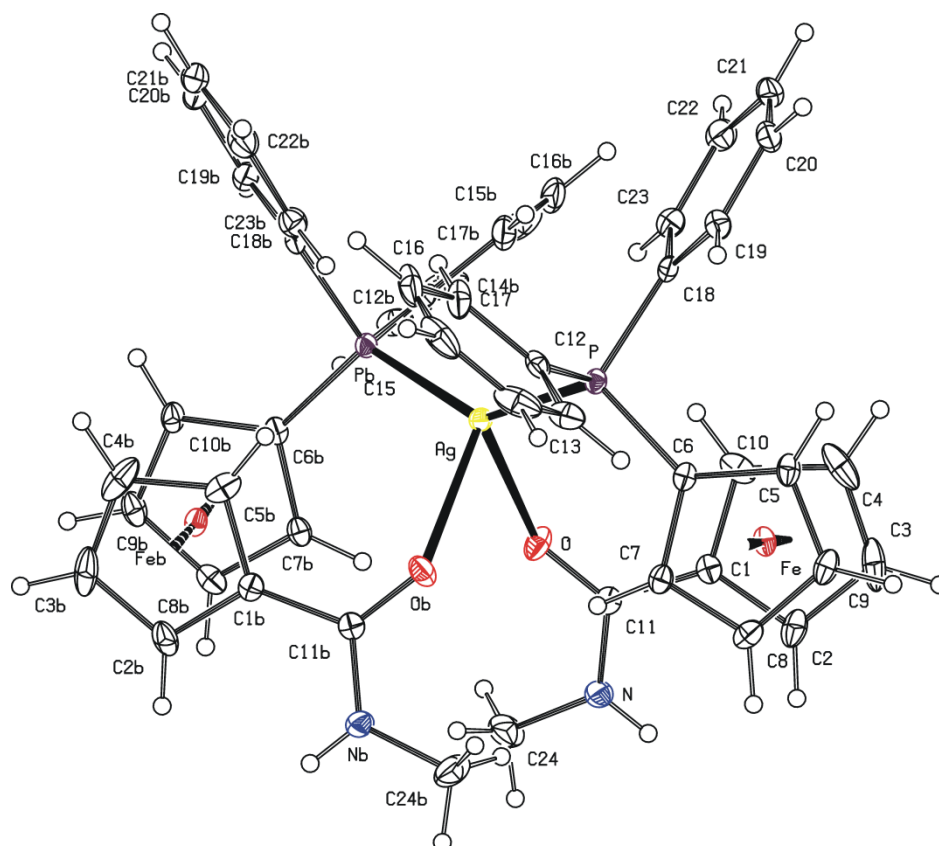

Compound 7d

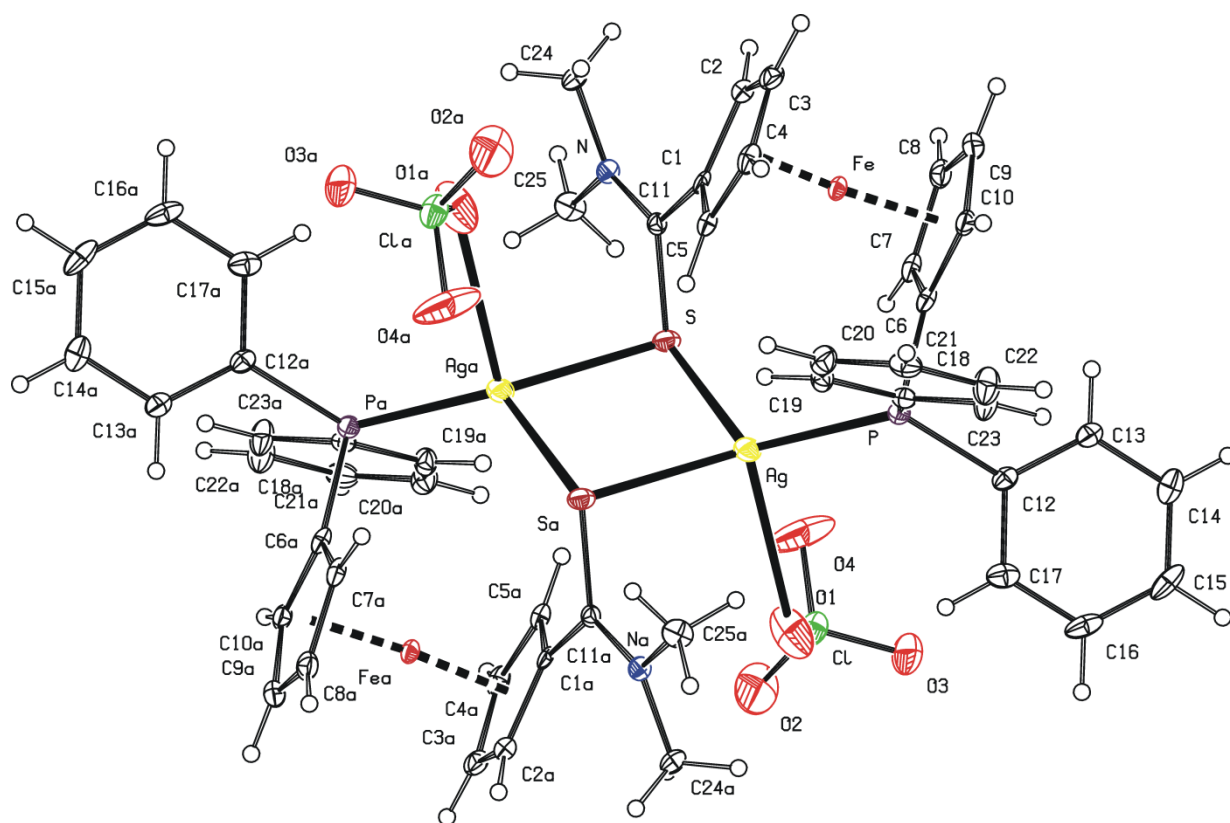

# Compound 8d

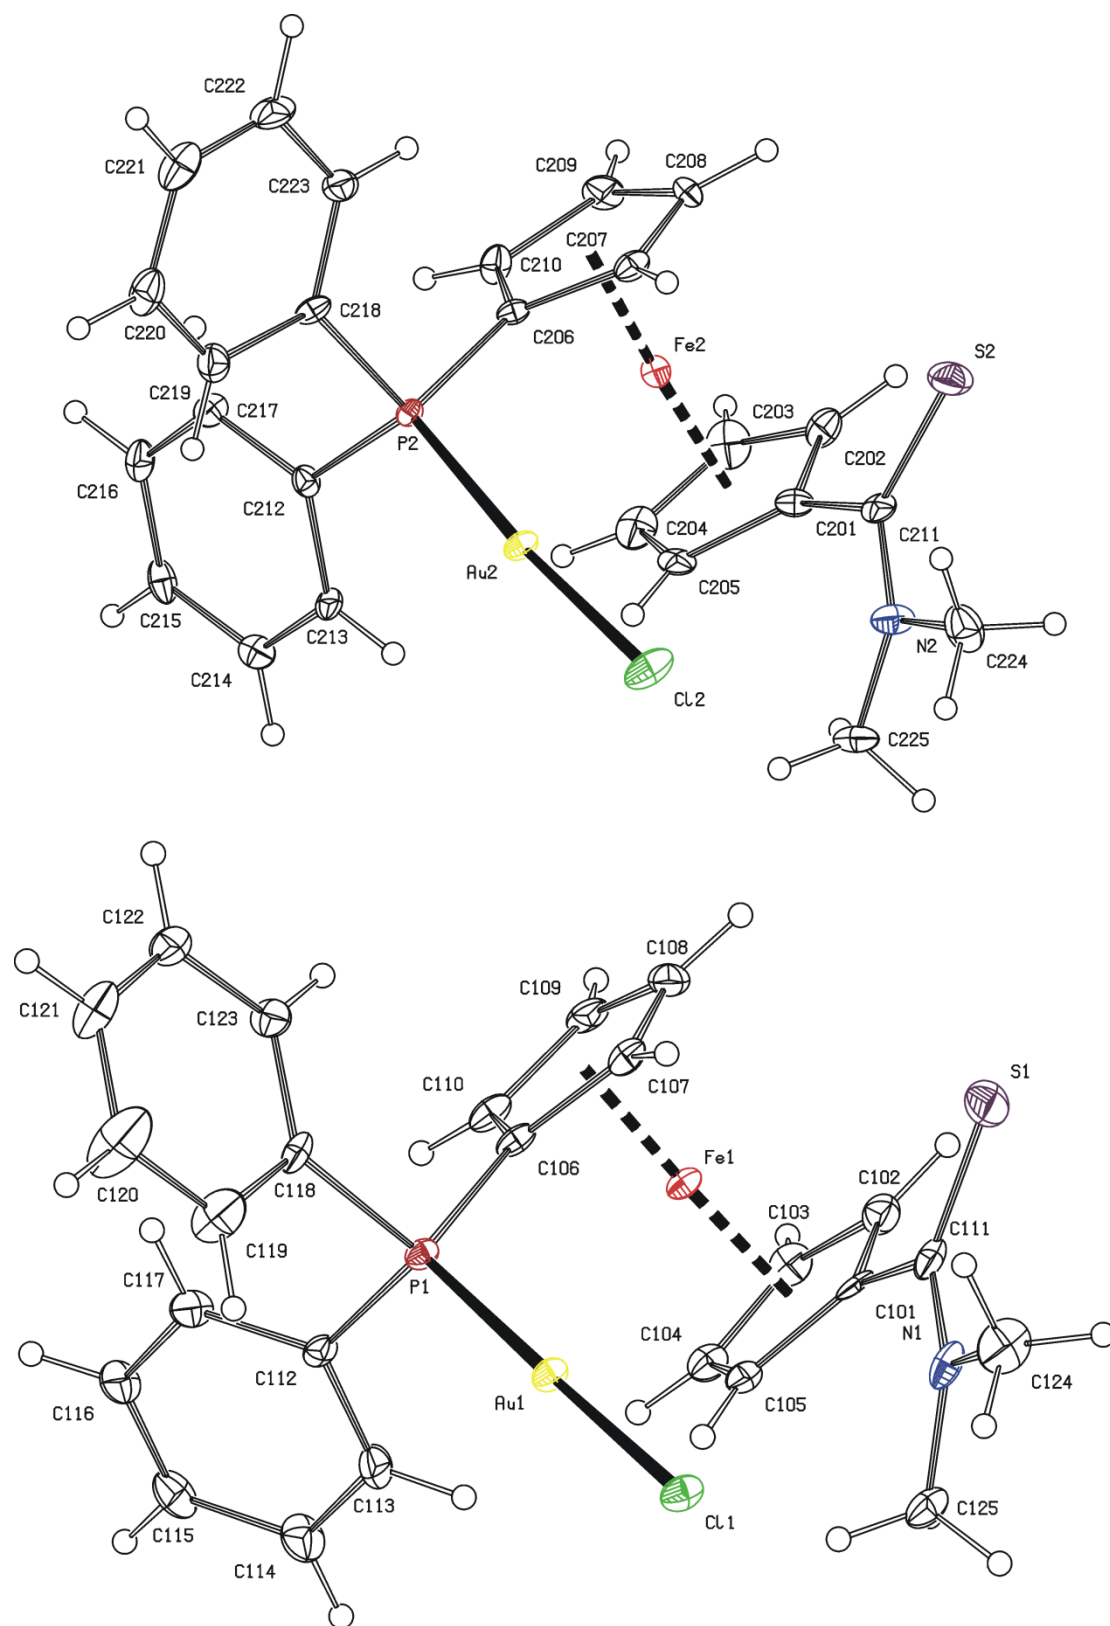



Least-squares overlap of the two independent molecules in the crystal structure of **8d**  
(Note: molecule 1 in black, molecule 2 in red; hydrogen atoms omitted for clarity)

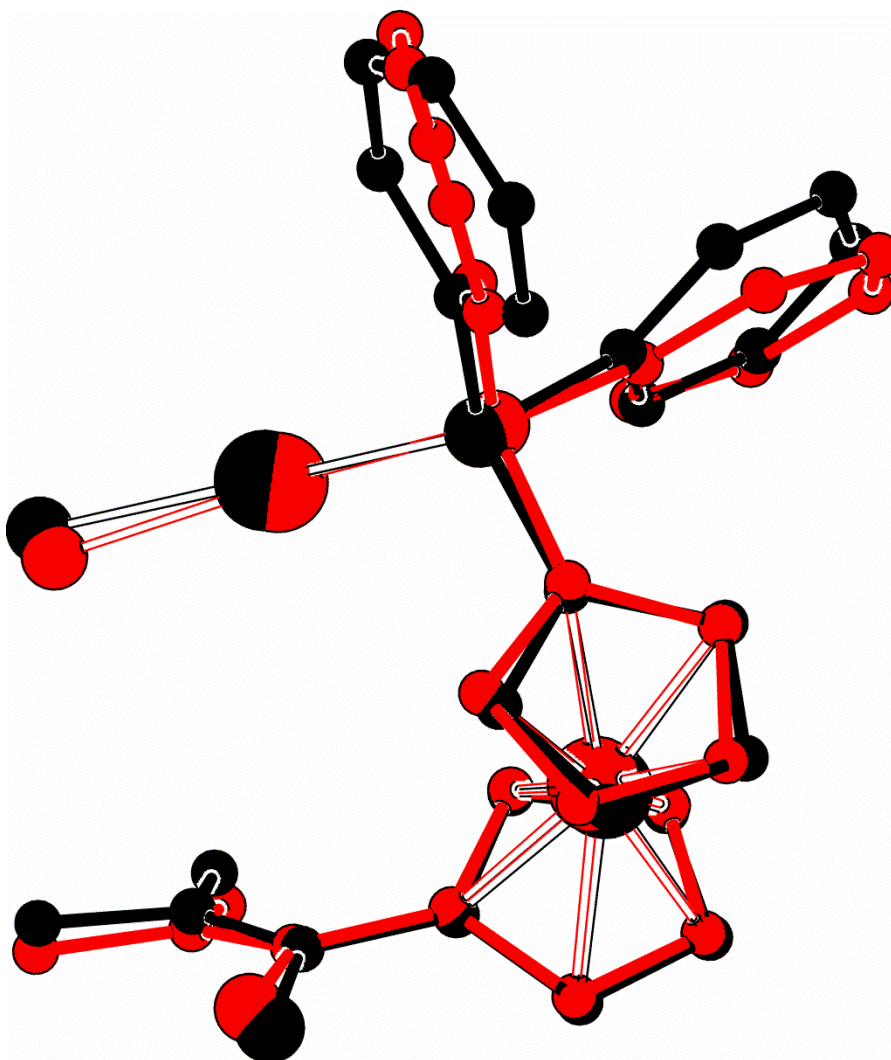

Crystals suitable for X-ray diffraction analysis were grown by crystallization from chloroform-hexane (**2**: orange block,  $0.15 \times 0.20 \times 0.21 \text{ mm}^3$ ; **3O**: orange plate,  $0.29 \times 0.30 \times 0.30 \text{ mm}^3$ ; **6b**·1/4CHCl<sub>3</sub>: red-orange prism,  $0.18 \times 0.30 \times 0.33 \text{ mm}^3$ ; **6a'**·CHCl<sub>3</sub>: orange prism,  $0.23 \times 0.26 \times 0.28 \text{ mm}^3$ ), chloroform/benzene-hexane (**7b**: orange prism,  $0.12 \times 0.18 \times 0.23 \text{ mm}^3$ ), chloroform-diethyl ether (**8d**: red plate,  $0.15 \times 0.24 \times 0.25 \text{ mm}^3$ ), dichloromethane-hexane (**3**: red prism,  $0.19 \times 0.31 \times 0.47 \text{ mm}^3$ ; **4O**·CHCl<sub>3</sub>: orange plate,  $0.13 \times 0.23 \times 0.32 \text{ mm}^3$ ), dichloromethane-pentane (**4**: orange prism,  $0.13 \times 0.28 \times 0.60 \text{ mm}^3$ ) and from ethyl acetate-hexane (**4S**: orange plate,  $0.06 \times 0.18 \times 0.41 \text{ mm}^3$ ). The crystals of **7d** were obtained by reactive diffusion approach (see main text).

**Table S1.** Summary of crystallographic data and structure refinement parameters.<sup>a</sup>

| Compound                                       | <b>2</b>                                    | <b>3</b>                                    | <b>3O</b>                              | <b>4</b>                                    |
|------------------------------------------------|---------------------------------------------|---------------------------------------------|----------------------------------------|---------------------------------------------|
| Formula                                        | C <sub>25</sub> H <sub>24</sub> FeNOP       | C <sub>25</sub> H <sub>24</sub> FeNPS       | C <sub>25</sub> H <sub>24</sub> FeNOPS | C <sub>24</sub> H <sub>22</sub> FeNOP       |
| <i>M</i>                                       | 441.27                                      | 457.33                                      | 473.33                                 | 427.25                                      |
| Crystal system                                 | monoclinic                                  | monoclinic                                  | triclinic                              | monoclinic                                  |
| Space group                                    | <i>P</i> 2 <sub>1</sub> / <i>n</i> (no. 14) | <i>P</i> 2 <sub>1</sub> / <i>c</i> (no. 14) | <i>P</i> -1 (no. 2)                    | <i>P</i> 2 <sub>1</sub> / <i>c</i> (no. 14) |
| <i>a</i> /Å                                    | 9.5479(2)                                   | 11.4811(3)                                  | 8.5443(2)                              | 9.0313(3)                                   |
| <i>b</i> /Å                                    | 14.2146(3)                                  | 24.8305(7)                                  | 10.0465(3)                             | 25.3683(8)                                  |
| <i>c</i> /Å                                    | 15.2152(3)                                  | 7.6806(2)                                   | 13.2078(3)                             | 9.3612(3)                                   |
| $\alpha$ /°                                    |                                             |                                             | 87.165(1)                              |                                             |
| $\beta$ /°                                     | 94.478(1)                                   | 101.066(1)                                  | 89.785(1)                              | 109.678(1)                                  |
| $\gamma$ /°                                    |                                             |                                             | 71.819(1)                              |                                             |
| <i>V</i> /Å <sup>3</sup>                       | 2058.70(7)                                  | 2148.9(1)                                   | 1075.76(5)                             | 2019.5(1)                                   |
| <i>Z</i>                                       | 4                                           | 4                                           | 2                                      | 4                                           |
| <i>D</i> <sub>calc</sub> (g mL <sup>-1</sup> ) | 1.424                                       | 1.414                                       | 1.461                                  | 1.405                                       |
| $\mu$ (Mo K $\alpha$ )/mm <sup>-1</sup>        | 0.827                                       | 0.885                                       | 0.890                                  | 0.840                                       |
| Diffns collected                               | 19138                                       | 19732                                       | 13660                                  | 13825                                       |
| Indep. diffns                                  | 4734                                        | 4923                                        | 4897                                   | 4634                                        |
| Observed <sup>b</sup> diffns                   | 3958                                        | 4405                                        | 4452                                   | 3967                                        |
| <i>R</i> <sub>int</sub> <sup>c</sup> /%        | 2.89                                        | 2.30                                        | 1.53                                   | 2.63                                        |
| No. of parameters                              | 264                                         | 264                                         | 273                                    | 254                                         |
| <i>R</i> <sup>d</sup> obsd diffns/%            | 3.01                                        | 2.88                                        | 2.67                                   | 3.03                                        |
| <i>R</i> , <i>wR</i> <sup>d</sup> all data/%   | 4.04, 7.11                                  | 3.35, 7.26                                  | 3.02, 6.86                             | 3.76, 7.62                                  |
| $\Delta\rho$ /e Å <sup>-3</sup>                | 0.35, -0.29                                 | 1.08, <sup>e</sup> -0.25                    | 0.42, -0.25                            | 0.36, -0.25                                 |
| CCDC entry                                     | 1029509                                     | 1029510                                     | 1029511                                | 1029512                                     |

(Table S1 continued)

| Compound                                       | <b>4O</b> ·CHCl <sub>3</sub>                                        | <b>4S</b>                              | <b>6b</b> ·1/4CHCl <sub>3</sub>                                                                                                             | <b>6d</b> ·2CHCl <sub>3</sub>                                                                                                       |
|------------------------------------------------|---------------------------------------------------------------------|----------------------------------------|---------------------------------------------------------------------------------------------------------------------------------------------|-------------------------------------------------------------------------------------------------------------------------------------|
| Formula                                        | C <sub>25</sub> H <sub>23</sub> Cl <sub>3</sub> FeNO <sub>2</sub> P | C <sub>24</sub> H <sub>22</sub> FeNOPS | C <sub>48.25</sub> H <sub>44.25</sub> BCl <sub>1.5</sub> Cu-<br>F <sub>4</sub> Fe <sub>2</sub> N <sub>2</sub> O <sub>2</sub> P <sub>2</sub> | C <sub>52</sub> H <sub>50</sub> BCl <sub>6</sub> CuF <sub>4</sub> -<br>Fe <sub>2</sub> N <sub>2</sub> P <sub>2</sub> S <sub>2</sub> |
| <i>M</i>                                       | 562.61                                                              | 459.31                                 | 1061.27                                                                                                                                     | 1303.75                                                                                                                             |
| Crystal system                                 | monoclinic                                                          | monoclinic                             | monoclinic                                                                                                                                  | monoclinic                                                                                                                          |
| Space group                                    | <i>C2/c</i> (no. 15)                                                | <i>Pc</i> (no. 7) <sup>f</sup>         | <i>P2<sub>1</sub>/c</i> (no. 14)                                                                                                            | <i>P2<sub>1</sub>/c</i> (no. 14)                                                                                                    |
| <i>a</i> /Å                                    | 35.0409(9)                                                          | 11.803(1)                              | 15.4973(5)                                                                                                                                  | 15.1921(4)                                                                                                                          |
| <i>b</i> /Å                                    | 10.9004(3)                                                          | 19.326(2)                              | 14.2226(4)                                                                                                                                  | 16.1101(3)                                                                                                                          |
| <i>c</i> /Å                                    | 12.9603(3)                                                          | 9.6446(8)                              | 20.7615(5)                                                                                                                                  | 22.5908(4)                                                                                                                          |
| $\alpha$ /°                                    |                                                                     |                                        |                                                                                                                                             |                                                                                                                                     |
| $\beta$ /°                                     | 93.644(1)                                                           | 108.311(3)                             | 91.252(1)                                                                                                                                   | 94.686(1)                                                                                                                           |
| $\gamma$ /°                                    |                                                                     |                                        |                                                                                                                                             |                                                                                                                                     |
| <i>V</i> /Å <sup>3</sup>                       | 4940.3(2)                                                           | 2088.6(3)                              | 4575.0(2)                                                                                                                                   | 5510.5(2)                                                                                                                           |
| <i>Z</i>                                       | 8                                                                   | 4                                      | 4                                                                                                                                           | 4                                                                                                                                   |
| <i>D</i> <sub>calc</sub> (g mL <sup>-1</sup> ) | 1.513                                                               | 1.461                                  | 1.541                                                                                                                                       | 1.571                                                                                                                               |
| $\mu$ (Mo K $\alpha$ )/mm <sup>-1</sup>        | 1.023                                                               | 0.914                                  | 1.302                                                                                                                                       | 1.379                                                                                                                               |
| Diffns collected                               | 19258                                                               | 13742                                  | 36503                                                                                                                                       | 65566                                                                                                                               |
| Indep. diffns                                  | 5664                                                                | 7435                                   | 8979                                                                                                                                        | 12652                                                                                                                               |
| Observed <sup>b</sup> diffns                   | 4473                                                                | 5600                                   | 7869                                                                                                                                        | 10679                                                                                                                               |
| <i>R</i> <sub>int</sub> <sup>c</sup> /%        | 3.61                                                                | 4.60                                   | 2.10                                                                                                                                        | 2.38                                                                                                                                |
| No. of parameters                              | 299                                                                 | 526                                    | 552                                                                                                                                         | 653                                                                                                                                 |
| <i>R</i> <sup>d</sup> obsd diffns/%            | 3.87                                                                | 4.87                                   | 3.92                                                                                                                                        | 3.56                                                                                                                                |
| <i>R</i> , <i>wR</i> <sup>d</sup> all data/%   | 5.49, 9.96                                                          | 7.76, 10.9                             | 4.46, 10.4                                                                                                                                  | 4.49, 9.45                                                                                                                          |
| $\Delta\rho$ /e Å <sup>-3</sup>                | 0.75, -0.79                                                         | 0.75, -0.38                            | 0.81, -0.74                                                                                                                                 | 1.49, -0.93 <sup>g</sup>                                                                                                            |
| CCDC entry                                     | 1029513                                                             | 1029514                                | 1029515                                                                                                                                     | 1029516                                                                                                                             |

(Table S1 continued)

| Compound                                            | <b>6a'</b> ·CHCl <sub>3</sub>                                                                                                                  | <b>7b</b> ·CHCl <sub>3</sub>                                                                                                   | <b>7d</b>                                                                                                                                                   | <b>8d</b>                                             |
|-----------------------------------------------------|------------------------------------------------------------------------------------------------------------------------------------------------|--------------------------------------------------------------------------------------------------------------------------------|-------------------------------------------------------------------------------------------------------------------------------------------------------------|-------------------------------------------------------|
| Formula                                             | C <sub>47</sub> H <sub>41</sub> BCl <sub>3</sub> CuF <sub>4</sub> <sup>-</sup><br>Fe <sub>2</sub> N <sub>2</sub> O <sub>2</sub> P <sub>2</sub> | C <sub>49</sub> H <sub>45</sub> AgCl <sub>4</sub> <sup>-</sup><br>Fe <sub>2</sub> N <sub>2</sub> O <sub>6</sub> P <sub>2</sub> | C <sub>50</sub> H <sub>48</sub> Ag <sub>2</sub> Cl <sub>2</sub> <sup>-</sup><br>Fe <sub>2</sub> N <sub>2</sub> O <sub>8</sub> P <sub>2</sub> S <sub>2</sub> | C <sub>25</sub> H <sub>24</sub> AuClFeNPS             |
| <i>M</i>                                            | 1096.42                                                                                                                                        | 1181.18                                                                                                                        | 1329.30                                                                                                                                                     | 689.75                                                |
| Crystal system                                      | monoclinic                                                                                                                                     | monoclinic                                                                                                                     | monoclinic                                                                                                                                                  | orthorhombic                                          |
| Space group                                         | <i>P</i> 2 <sub>1</sub> / <i>c</i> (no. 14)                                                                                                    | <i>C</i> 2 (no. 5)                                                                                                             | <i>P</i> 2 <sub>1</sub> / <i>n</i> (no. 14)                                                                                                                 | <i>Pca</i> 2 <sub>1</sub> (no.29) <sup><i>h</i></sup> |
| <i>a</i> /Å                                         | 14.2861(4)                                                                                                                                     | 18.0426(3)                                                                                                                     | 7.9090(2)                                                                                                                                                   | 37.4298(9)                                            |
| <i>b</i> /Å                                         | 11.8455(3)                                                                                                                                     | 14.5715(2)                                                                                                                     | 16.0180(5)                                                                                                                                                  | 9.4501(2)                                             |
| <i>c</i> /Å                                         | 30.249(1)                                                                                                                                      | 9.2242(2)                                                                                                                      | 19.5538(6)                                                                                                                                                  | 13.3460(3)                                            |
| $\alpha$ /°                                         |                                                                                                                                                |                                                                                                                                |                                                                                                                                                             |                                                       |
| $\beta$ /°                                          | 91.666(1)                                                                                                                                      | 91.985(1)                                                                                                                      | 98.075(1)                                                                                                                                                   |                                                       |
| $\gamma$ /°                                         |                                                                                                                                                |                                                                                                                                |                                                                                                                                                             |                                                       |
| <i>V</i> /Å <sup>3</sup>                            | 5116.8(3)                                                                                                                                      | 2423.66(7)                                                                                                                     | 2452.6(1)                                                                                                                                                   | 4720.7(2)                                             |
| <i>Z</i>                                            | 4                                                                                                                                              | 2                                                                                                                              | 2                                                                                                                                                           | 8                                                     |
| <i>D</i> <sub>calc</sub> (g mL <sup>-1</sup> )      | 1.423                                                                                                                                          | 1.619                                                                                                                          | 1.800                                                                                                                                                       | 1.941                                                 |
| $\mu$ (Mo K $\alpha$ )/mm <sup>-1</sup>             | 1.243                                                                                                                                          | 1.328                                                                                                                          | 1.683                                                                                                                                                       | 7.106                                                 |
| Diffns collected                                    | 47156                                                                                                                                          | 12514                                                                                                                          | 18097                                                                                                                                                       | 27368                                                 |
| Indep. diffns                                       | 11722                                                                                                                                          | 4906                                                                                                                           | 5350                                                                                                                                                        | 8998                                                  |
| Observed <sup><i>b</i></sup> diffns                 | 9384                                                                                                                                           | 4751                                                                                                                           | 4239                                                                                                                                                        | 8246                                                  |
| <i>R</i> <sub>int</sub> <sup><i>c</i></sup> /%      | 3.22                                                                                                                                           | 2.16                                                                                                                           | 3.36                                                                                                                                                        | 3.04                                                  |
| No. of parameters                                   | 634                                                                                                                                            | 330                                                                                                                            | 318                                                                                                                                                         | 563                                                   |
| <i>R</i> <sup><i>d</i></sup> obsd diffns/%          | 6.02                                                                                                                                           | 2.42                                                                                                                           | 5.17                                                                                                                                                        | 3.39                                                  |
| <i>R</i> , <i>wR</i> <sup><i>d</i></sup> all data/% | 7.34, 17.2                                                                                                                                     | 2.58, 5.38                                                                                                                     | 7.02, 12.6                                                                                                                                                  | 3.92, 7.95                                            |
| $\Delta\rho$ /e Å <sup>-3</sup>                     | 2.35, -1.84 <sup><i>g</i></sup>                                                                                                                | 0.77, -0.77                                                                                                                    | 3.37 <sup><i>g</i></sup> , -1.46                                                                                                                            | 3.17, <sup><i>i</i></sup> -1.26                       |
| CCDC entry                                          | 1029517                                                                                                                                        | 1029518                                                                                                                        | 1029519                                                                                                                                                     | 1029520                                               |

<sup>*a*</sup> Common details: *T* = 150(2) K. <sup>*b*</sup> Diffractions with  $I > 2\sigma(I)$ . <sup>*c*</sup>  $R_{\text{int}} = \frac{\sum |F_o^2 - F_o^2(\text{mean})|}{\sum F_o^2}$ , where  $F_o^2(\text{mean})$  is the average intensity of symmetry-equivalent diffractions. <sup>*d*</sup>  $R = \frac{\sum ||F_o| - |F_c||}{\sum |F_o|}$ ,  $wR = [\frac{\sum \{w(F_o^2 - F_c^2)^2\}}{\sum w(F_o^2)^2}]^{1/2}$ . <sup>*e*</sup> Electron density maximum due to lone electron pair at the phosphorus atom. <sup>*f*</sup> Flack's enantiomorph parameter: 0.00(5). <sup>*g*</sup> Residual electron density near the heaviest atom. <sup>*h*</sup> Flack's enantiomorph parameter: 0.002(6).

**Table S2.** Comparison of DFT calculated and experimental geometry (crystal state) for **2**.

|     |      |            |       |     |          |           |        |
|-----|------|------------|-------|-----|----------|-----------|--------|
| Fe  | -C1  | 2.0456(16) | 2.070 | C13 | -C14     | 1.394(2)  | 1.391  |
| Fe  | -C2  | 2.0492(17) | 2.066 | C14 | -C15     | 1.376(3)  | 1.395  |
| Fe  | -C3  | 2.0530(17) | 2.075 | C15 | -C16     | 1.388(3)  | 1.392  |
| Fe  | -C4  | 2.0418(17) | 2.076 | C16 | -C17     | 1.385(3)  | 1.395  |
| Fe  | -C5  | 2.0327(16) | 2.061 | C18 | -C19     | 1.393(2)  | 1.401  |
| Fe  | -C6  | 2.0465(16) | 2.081 | C18 | -C23     | 1.392(2)  | 1.401  |
| Fe  | -C7  | 2.0319(17) | 2.061 | C19 | -C20     | 1.386(3)  | 1.394  |
| Fe  | -C8  | 2.0418(19) | 2.068 | C20 | -C21     | 1.384(3)  | 1.393  |
| Fe  | -C9  | 2.0501(18) | 2.068 | C21 | -C22     | 1.376(2)  | 1.394  |
| Fe  | -C10 | 2.0520(16) | 2.071 | C22 | -C23     | 1.391(2)  | 1.393  |
| P   | -C6  | 1.8195(17) | 1.833 | C1  | -Fe -C2  | 40.84(7)  | 40.58  |
| P   | -C12 | 1.8324(16) | 1.856 | C1  | -Fe -C3  | 68.64(7)  | 67.91  |
| P   | -C18 | 1.8413(16) | 1.859 | C1  | -Fe -C4  | 68.65(7)  | 67.81  |
| O   | -C11 | 1.225(2)   | 1.226 | C1  | -Fe -C5  | 41.04(7)  | 40.58  |
| N   | -C11 | 1.356(2)   | 1.376 | C1  | -Fe -C6  | 161.64(7) | 175.47 |
| N   | -C24 | 1.460(2)   | 1.456 | C1  | -Fe -C7  | 124.05(7) | 134.96 |
| N   | -C25 | 1.460(2)   | 1.456 | C1  | -Fe -C8  | 106.82(7) | 108.96 |
| C1  | -C2  | 1.429(2)   | 1.434 | C1  | -Fe -C9  | 120.33(7) | 112.26 |
| C1  | -C5  | 1.429(2)   | 1.432 | C1  | -Fe -C10 | 155.86(7) | 142.43 |
| C1  | -C11 | 1.497(2)   | 1.496 | C2  | -Fe -C3  | 40.64(7)  | 40.19  |
| C2  | -C3  | 1.425(3)   | 1.423 | C2  | -Fe -C4  | 68.36(7)  | 67.63  |
| C3  | -C4  | 1.419(2)   | 1.427 | C2  | -Fe -C5  | 68.86(7)  | 68.03  |
| C4  | -C5  | 1.424(2)   | 1.421 | C2  | -Fe -C6  | 155.77(7) | 143.90 |
| C6  | -C7  | 1.435(2)   | 1.437 | C2  | -Fe -C7  | 162.33(7) | 174.85 |
| C6  | -C10 | 1.429(2)   | 1.434 | C2  | -Fe -C8  | 126.04(7) | 135.37 |
| C7  | -C8  | 1.421(3)   | 1.421 | C2  | -Fe -C9  | 108.97(7) | 110.54 |
| C8  | -C9  | 1.416(3)   | 1.425 | C2  | -Fe -C10 | 121.69(7) | 114.24 |
| C9  | -C10 | 1.424(2)   | 1.424 | C3  | -Fe -C4  | 40.56(7)  | 40.20  |
| C12 | -C13 | 1.394(2)   | 1.403 | C3  | -Fe -C5  | 68.79(7)  | 67.77  |
| C12 | -C17 | 1.396(2)   | 1.400 | C3  | -Fe -C6  | 120.30(7) | 115.25 |

|    |     |      |            |        |     |     |      |            |        |
|----|-----|------|------------|--------|-----|-----|------|------------|--------|
| C3 | -Fe | -C7  | 154.52(7)  | 144.22 | C7  | -C8 | -C9  | 108.33(16) | 107.83 |
| C3 | -Fe | -C8  | 163.91(7)  | 175.51 | Fe  | -C9 | -C8  | 69.43(10)  | 69.87  |
| C3 | -Fe | -C9  | 127.32(7)  | 137.12 | Fe  | -C9 | -C10 | 69.76(10)  | 70.00  |
| C3 | -Fe | -C10 | 109.16(7)  | 112.51 | C8  | -C9 | -C10 | 108.00(16) | 108.22 |
| C4 | -Fe | -C5  | 40.91(7)   | 40.17  | C4  | -Fe | -C9  | 164.10(7)  | 177.28 |
| C4 | -Fe | -C6  | 106.85(7)  | 112.23 | C4  | -Fe | -C10 | 126.33(7)  | 138.20 |
| C4 | -Fe | -C7  | 118.88(7)  | 114.30 | C5  | -Fe | -C6  | 124.03(7)  | 136.62 |
| C4 | -Fe | -C8  | 153.78(7)  | 142.40 | C5  | -Fe | -C7  | 105.32(7)  | 110.09 |
| C5 | -C1 | -C11 | 122.96(15) | 122.69 | C5  | -Fe | -C8  | 118.63(7)  | 112.19 |
| Fe | -C2 | -C1  | 69.45(9)   | 69.84  | C5  | -Fe | -C9  | 154.23(7)  | 141.52 |
| Fe | -C2 | -C3  | 69.82(10)  | 70.22  | C5  | -Fe | -C10 | 162.49(7)  | 176.99 |
| C1 | -C2 | -C3  | 108.18(15) | 108.24 | C6  | -Fe | -C7  | 41.20(6)   | 40.60  |
| Fe | -C3 | -C2  | 69.54(10)  | 69.59  | C6  | -Fe | -C8  | 68.91(7)   | 68.08  |
| Fe | -C3 | -C4  | 69.30(10)  | 69.95  | C6  | -Fe | -C9  | 68.78(7)   | 67.94  |
| C2 | -C3 | -C4  | 107.83(15) | 108.01 | C6  | -Fe | -C10 | 40.80(7)   | 40.40  |
| Fe | -C4 | -C3  | 70.14(10)  | 69.85  | C7  | -Fe | -C8  | 40.83(7)   | 40.26  |
| Fe | -C4 | -C5  | 69.20(9)   | 69.37  | C7  | -Fe | -C9  | 68.60(7)   | 67.71  |
| C3 | -C4 | -C5  | 108.52(15) | 108.16 | C7  | -Fe | -C10 | 68.66(7)   | 67.82  |
| Fe | -C5 | -C1  | 69.97(9)   | 70.03  | C8  | -Fe | -C9  | 40.50(8)   | 40.31  |
| Fe | -C5 | -C4  | 69.89(9)   | 70.46  | C8  | -Fe | -C10 | 68.28(7)   | 67.78  |
| C1 | -C5 | -C4  | 107.75(15) | 108.28 | C9  | -Fe | -C10 | 40.61(7)   | 40.25  |
| Fe | -C6 | -P   | 123.88(9)  | 127.22 | C6  | -P  | -C12 | 101.15(7)  | 101.79 |
| Fe | -C6 | -C7  | 68.85(9)   | 68.96  | C6  | -P  | -C18 | 100.66(7)  | 102.29 |
| Fe | -C6 | -C10 | 69.81(9)   | 69.44  | C12 | -P  | -C18 | 100.67(7)  | 101.25 |
| P  | -C6 | -C7  | 123.93(13) | 122.36 | C11 | -N  | -C24 | 117.87(14) | 118.10 |
| P  | -C6 | -C10 | 128.92(12) | 130.79 | C11 | -N  | -C25 | 125.29(14) | 125.26 |
| C7 | -C6 | -C10 | 107.08(14) | 106.84 | C24 | -N  | -C25 | 116.29(13) | 114.92 |
| Fe | -C7 | -C6  | 69.95(9)   | 70.43  | Fe  | -C1 | -C2  | 69.72(9)   | 69.57  |
| Fe | -C7 | -C8  | 69.96(10)  | 70.15  | Fe  | -C1 | -C5  | 69.00(9)   | 69.40  |
| C6 | -C7 | -C8  | 108.16(15) | 108.70 | Fe  | -C1 | -C11 | 126.81(12) | 123.25 |
| Fe | -C8 | -C7  | 69.21(10)  | 69.60  | C2  | -C1 | -C5  | 107.72(14) | 107.31 |
| Fe | -C8 | -C9  | 70.07(11)  | 69.82  | C2  | -C1 | -C11 | 129.33(15) | 129.89 |

|     |      |      |            |        |     |      |      |            |        |
|-----|------|------|------------|--------|-----|------|------|------------|--------|
| Fe  | -C10 | -C6  | 69.39(9)   | 70.16  | C15 | -C16 | -C17 | 120.08(17) | 120.35 |
| Fe  | -C10 | -C9  | 69.62(9)   | 69.75  | C12 | -C17 | -C16 | 120.48(16) | 120.57 |
| C6  | -C10 | -C9  | 108.43(15) | 108.42 | P   | -C18 | -C19 | 117.61(12) | 117.57 |
| O   | -C11 | -N   | 121.69(15) | 121.57 | P   | -C18 | -C23 | 124.49(12) | 123.92 |
| O   | -C11 | -C1  | 121.41(15) | 120.59 | C19 | -C18 | -C23 | 117.90(15) | 118.49 |
| N   | -C11 | -C1  | 116.90(15) | 117.83 | C18 | -C19 | -C20 | 121.42(16) | 120.92 |
| P   | -C12 | -C13 | 117.04(12) | 117.12 | C19 | -C20 | -C21 | 119.63(17) | 119.98 |
| P   | -C12 | -C17 | 124.16(13) | 124.28 | C20 | -C21 | -C22 | 120.03(16) | 119.68 |
| C13 | -C12 | -C17 | 118.79(15) | 118.53 | C21 | -C22 | -C23 | 120.13(16) | 120.25 |
| C12 | -C13 | -C14 | 120.48(15) | 120.87 | C18 | -C23 | -C22 | 120.89(15) | 120.66 |
| C13 | -C14 | -C15 | 119.99(16) | 120.08 |     |      |      |            |        |
| C14 | -C15 | -C16 | 120.16(16) | 119.58 |     |      |      |            |        |



**Table S3.** Comparison of DFT calculated and experimental geometry (crystal state) for **3**.

|     |      |            |       |     |      |          |           |        |
|-----|------|------------|-------|-----|------|----------|-----------|--------|
| Fe  | -C1  | 2.0432(16) | 2.086 | C13 | -C14 | 1.388(2) | 1.391     |        |
| Fe  | -C2  | 2.0349(16) | 2.068 | C14 | -C15 | 1.383(3) | 1.394     |        |
| Fe  | -C3  | 2.0520(16) | 2.074 | C15 | -C16 | 1.383(2) | 1.392     |        |
| Fe  | -C4  | 2.0695(15) | 2.081 | C16 | -C17 | 1.395(2) | 1.395     |        |
| Fe  | -C5  | 2.0591(16) | 2.079 | C18 | -C19 | 1.393(2) | 1.401     |        |
| Fe  | -C6  | 2.0531(16) | 2.081 | C18 | -C23 | 1.395(2) | 1.401     |        |
| Fe  | -C7  | 2.0477(16) | 2.068 | C19 | -C20 | 1.388(3) | 1.394     |        |
| Fe  | -C8  | 2.0514(18) | 2.078 | C20 | -C21 | 1.386(3) | 1.393     |        |
| Fe  | -C9  | 2.0393(18) | 2.072 | C21 | -C22 | 1.380(3) | 1.394     |        |
| Fe  | -C10 | 2.0440(18) | 2.068 | C22 | -C23 | 1.385(3) | 1.393     |        |
| S   | -C11 | 1.6891(16) | 1.685 | C1  | -Fe  | -C2      | 41.30(6)  | 40.42  |
| P   | -C6  | 1.8108(16) | 1.836 | C1  | -Fe  | -C3      | 68.92(7)  | 67.81  |
| P   | -C12 | 1.8353(16) | 1.856 | C1  | -Fe  | -C4      | 68.54(6)  | 67.70  |
| P   | -C18 | 1.8389(16) | 1.858 | C1  | -Fe  | -C5      | 41.09(6)  | 40.53  |
| N   | -C11 | 1.333(2)   | 1.356 | C1  | -Fe  | -C6      | 162.17(6) | 164.40 |
| N   | -C24 | 1.465(2)   | 1.461 | C1  | -Fe  | -C7      | 124.58(7) | 127.79 |
| N   | -C25 | 1.464(2)   | 1.462 | C1  | -Fe  | -C8      | 106.98(7) | 109.78 |
| C1  | -C2  | 1.438(2)   | 1.435 | C1  | -Fe  | -C9      | 119.87(7) | 120.96 |
| C1  | -C5  | 1.440(2)   | 1.443 | C1  | -Fe  | -C10     | 155.33(6) | 154.40 |
| C1  | -C11 | 1.482(2)   | 1.486 | C2  | -Fe  | -C3      | 40.64(7)  | 40.00  |
| C2  | -C3  | 1.419(2)   | 1.416 | C2  | -Fe  | -C4      | 68.09(7)  | 67.25  |
| C3  | -C4  | 1.417(2)   | 1.424 | C2  | -Fe  | -C5      | 68.68(6)  | 67.51  |
| C4  | -C5  | 1.419(2)   | 1.418 | C2  | -Fe  | -C6      | 156.16(7) | 153.81 |
| C6  | -C7  | 1.437(2)   | 1.436 | C2  | -Fe  | -C7      | 158.13(7) | 163.07 |
| C6  | -C10 | 1.430(2)   | 1.433 | C2  | -Fe  | -C8      | 119.88(8) | 125.21 |
| C7  | -C8  | 1.425(3)   | 1.424 | C2  | -Fe  | -C9      | 102.53(8) | 106.33 |
| C8  | -C9  | 1.416(3)   | 1.424 | C2  | -Fe  | -C10     | 118.38(6) | 118.69 |
| C9  | -C10 | 1.425(3)   | 1.424 | C3  | -Fe  | -C4      | 40.22(6)  | 40.08  |
| C12 | -C13 | 1.402(2)   | 1.403 | C3  | -Fe  | -C5      | 68.07(6)  | 67.34  |
| C12 | -C17 | 1.392(2)   | 1.400 | C3  | -Fe  | -C6      | 122.55(7) | 119.96 |

|    |     |      |            |        |     |     |      |            |        |
|----|-----|------|------------|--------|-----|-----|------|------------|--------|
| C3 | -Fe | -C7  | 161.19(7)  | 156.65 | C7  | -C8 | -C9  | 108.26(16) | 108.05 |
| C3 | -Fe | -C8  | 154.83(8)  | 159.95 | Fe  | -C9 | -C8  | 70.20(11)  | 70.17  |
| C3 | -Fe | -C9  | 118.44(8)  | 122.59 | Fe  | -C9 | -C10 | 69.76(10)  | 69.75  |
| C3 | -Fe | -C10 | 104.49(7)  | 105.59 | C8  | -C9 | -C10 | 108.21(17) | 107.98 |
| C4 | -Fe | -C5  | 40.21(6)   | 39.86  | C4  | -Fe | -C9  | 155.89(8)  | 159.51 |
| C4 | -Fe | -C6  | 110.35(6)  | 108.69 | C4  | -Fe | -C10 | 122.55(7)  | 124.10 |
| C4 | -Fe | -C7  | 127.70(6)  | 123.83 | C5  | -Fe | -C6  | 126.58(6)  | 127.09 |
| C4 | -Fe | -C8  | 163.35(7)  | 159.21 | C5  | -Fe | -C7  | 112.21(6)  | 111.68 |
| C5 | -C1 | -C11 | 129.65(14) | 129.44 | C5  | -Fe | -C8  | 126.08(7)  | 124.73 |
| Fe | -C2 | -C1  | 69.66(9)   | 70.48  | C5  | -Fe | -C9  | 158.90(7)  | 157.79 |
| Fe | -C2 | -C3  | 70.33(9)   | 70.24  | C5  | -Fe | -C10 | 160.23(7)  | 161.76 |
| C1 | -C2 | -C3  | 108.39(14) | 108.93 | C6  | -Fe | -C7  | 41.03(7)   | 40.50  |
| Fe | -C3 | -C2  | 69.03(9)   | 69.76  | C6  | -Fe | -C8  | 68.70(7)   | 67.83  |
| Fe | -C3 | -C4  | 70.55(9)   | 70.25  | C6  | -Fe | -C9  | 68.85(7)   | 67.93  |
| C2 | -C3 | -C4  | 108.21(14) | 107.97 | C6  | -Fe | -C10 | 40.85(6)   | 40.41  |
| Fe | -C4 | -C3  | 69.23(9)   | 69.67  | C7  | -Fe | -C8  | 40.68(8)   | 40.18  |
| Fe | -C4 | -C5  | 69.50(9)   | 70.00  | C7  | -Fe | -C9  | 68.57(8)   | 67.66  |
| C3 | -C4 | -C5  | 108.43(14) | 108.22 | C7  | -Fe | -C10 | 68.67(7)   | 67.72  |
| Fe | -C5 | -C1  | 68.87(9)   | 69.98  | C8  | -Fe | -C9  | 40.51(8)   | 40.13  |
| Fe | -C5 | -C4  | 70.29(9)   | 70.15  | C8  | -Fe | -C10 | 68.38(7)   | 67.49  |
| C1 | -C5 | -C4  | 108.22(13) | 108.46 | C9  | -Fe | -C10 | 40.85(7)   | 40.23  |
| Fe | -C6 | -P   | 128.07(8)  | 127.08 | C6  | -P  | -C12 | 101.60(7)  | 101.59 |
| Fe | -C6 | -C7  | 69.28(9)   | 69.24  | C6  | -P  | -C18 | 105.45(7)  | 101.81 |
| Fe | -C6 | -C10 | 69.24(9)   | 69.29  | C12 | -P  | -C18 | 100.43(7)  | 101.43 |
| P  | -C6 | -C7  | 122.40(12) | 122.74 | C11 | -N  | -C24 | 126.13(15) | 125.37 |
| P  | -C6 | -C10 | 130.35(13) | 130.39 | C11 | -N  | -C25 | 119.84(15) | 119.93 |
| C7 | -C6 | -C10 | 107.21(14) | 106.86 | C24 | -N  | -C25 | 113.66(15) | 114.25 |
| Fe | -C7 | -C6  | 69.68(9)   | 70.27  | Fe  | -C1 | -C2  | 69.04(9)   | 69.10  |
| Fe | -C7 | -C8  | 69.80(10)  | 70.29  | Fe  | -C1 | -C5  | 70.05(9)   | 69.50  |
| C6 | -C7 | -C8  | 108.03(14) | 108.47 | Fe  | -C1 | -C11 | 130.44(11) | 133.57 |
| Fe | -C8 | -C7  | 69.52(10)  | 69.52  | C2  | -C1 | -C5  | 106.75(14) | 106.41 |
| Fe | -C8 | -C9  | 69.29(11)  | 69.70  | C2  | -C1 | -C11 | 123.31(14) | 123.42 |

|     |      |      |            |        |     |      |      |            |        |
|-----|------|------|------------|--------|-----|------|------|------------|--------|
| Fe  | -C10 | -C6  | 69.92(9)   | 70.31  | C15 | -C16 | -C17 | 120.11(16) | 120.32 |
| Fe  | -C10 | -C9  | 69.40(10)  | 70.03  | C12 | -C17 | -C16 | 120.73(15) | 120.57 |
| C6  | -C10 | -C9  | 108.28(15) | 108.63 | P   | -C18 | -C19 | 117.35(12) | 117.68 |
| S   | -C11 | -N   | 121.44(12) | 121.03 | P   | -C18 | -C23 | 123.72(12) | 123.81 |
| S   | -C11 | -C1  | 117.55(11) | 118.78 | C19 | -C18 | -C23 | 118.51(15) | 118.50 |
| N   | -C11 | -C1  | 120.94(14) | 120.10 | C18 | -C19 | -C20 | 120.81(17) | 120.92 |
| P   | -C12 | -C13 | 118.25(12) | 116.94 | C19 | -C20 | -C21 | 119.82(19) | 119.97 |
| P   | -C12 | -C17 | 123.23(12) | 124.47 | C20 | -C21 | -C22 | 120.0(2)   | 119.70 |
| C13 | -C12 | -C17 | 118.45(15) | 118.55 | C21 | -C22 | -C23 | 120.26(19) | 120.25 |
| C12 | -C13 | -C14 | 120.45(16) | 120.86 | C18 | -C23 | -C22 | 120.61(17) | 120.64 |
| C13 | -C14 | -C15 | 120.44(16) | 120.08 |     |      |      |            |        |
| C14 | -C15 | -C16 | 119.77(16) | 119.61 |     |      |      |            |        |

An overlap of the experimentally determined (crystal state; **red**) and DFT optimized (gas phase; **blue**) geometries of **2** and **3**.

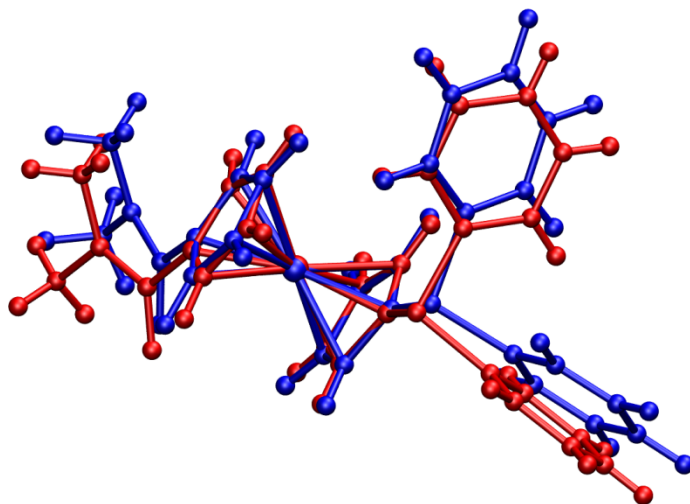

2

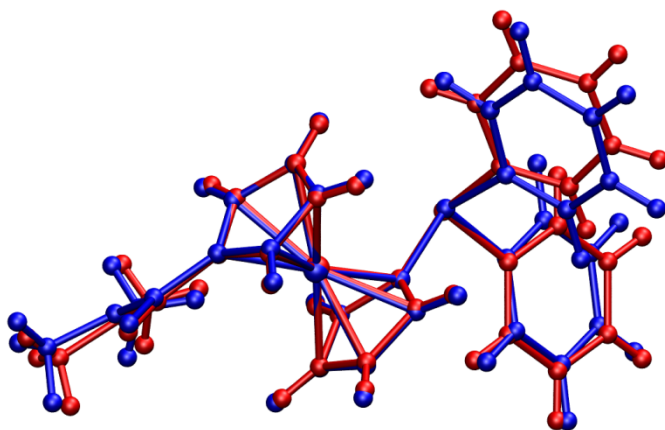

3

## Differential pulse voltammograms of complex **6c**

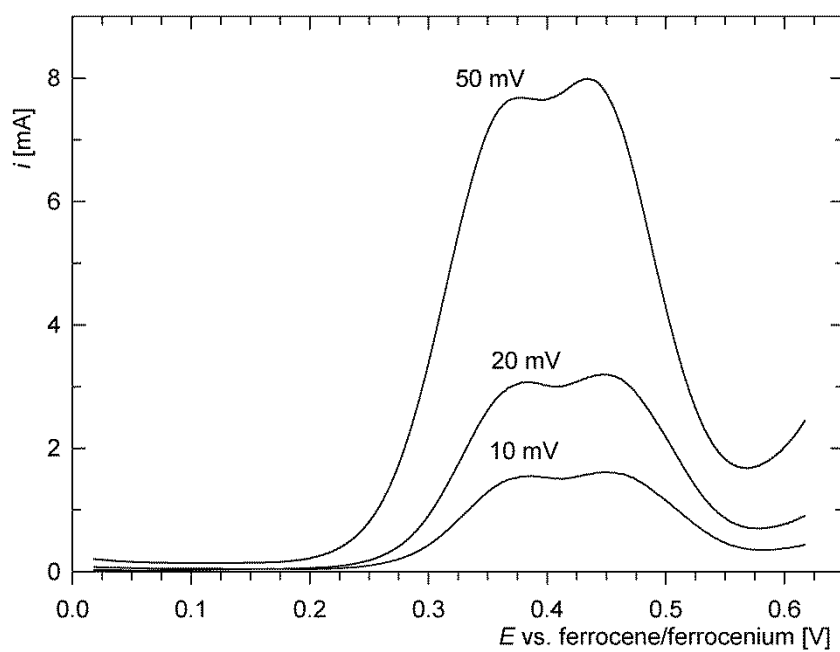

The voltammograms were recorded with different modulation amplitude (given in the Figure) at glassy carbon disc electrode in 1,2-dichloroethane containing 0.1 M  $\text{Bu}_4\text{N}[\text{PF}_6]$  as the supporting electrolyte.
